# Supplementary material for: Determination of circuit-specific morphological adaptations in ventral tegmental area dopamine neurons by chronic morphine
Source: Mol Brain. 2019 Feb 8;12:10. doi: 10.1186/s13041-019-0435-6 (PMC6368752; doi:10.1186/s13041-019-0435-6)
Supplement: Supplementary file 2 — Table S2. Soma size data of all individual cells used in studies. (XLSX 63 kb) [file 13041_2019_435_MOESM2_ESM.xlsx]

## Sheet: Combined one sheet
	Mouse	surface area	mean
L.PN-DAT-Cre	1	531.159	505.168
		529.495
		307.73
		531.821
		519.409
		580.046
		533.433
		487.221
		522.744
		514.737
		549.743
		454.473
	2	442.025	453.173
		373.115
		526.98
		344.925
		536.907
		492.415
		541.91
		438.018
		382.262
	3	778.741	529.542
		586.691
		364.829
		455.823
		449.756
		541.411
	4	495.888	451.876
		387.216
		446.823
		747.922
		565.323
		324.424
		264.599
		323.553
		469.657
		398.894
		546.333
	5	524.099	479.455
		538.804
		491.55
		522.513
		647.982
		433.304
		416.508
		459.149
		279.67
		510.519
		431.956
		499.633
		477.23
	6	608.601	637.677
		504.374
		949.075
		668.346
		615.249
		588.741
		571.793
		779.971
		517.16
		573.46
	7	742.303	587.117
		665.32
		418.485
		551.408
		558.066
	Mouse	surface area	mean
L.PN-TH-Cre	1	406.89	482.444
		676.964
		597.607
		322.191
		382.385
		433.601
		567.054
		519.003
		498.65
		597.226
		561.256
		501.657
		48.7652
		559.141
		564.262
	2	665.931	572.151
		499.603
		509.294
		627.569
		547.297
		519.242
		519.407
		668.234
		609.374
		555.561
	3	704.326	472.943
		429.536
		356.169
		401.743
	4	367.248	483.558
		486.368
		411.106
		454.622
		545.954
		636.048
	5	350.068	497.925
		425.676
		466.561
		549.979
		621.953
		605.025
		452.692
		511.448
	Mouse	surface area	mean
PN-DAT-Cre	1	278.084	444.96
		425.903
		295.502
		395.681
		473.028
		356.624
		298.925
		214.865
		401.04
		488.701
		467.131
		426.563
		425.331
		360.577
		397.973
		408.231
		443.238
		702.866
		391.437
		409.102
		387.482
		544.139
		631.094
		441.327
		456.297
		584.959
		394.915
		524.291
		409.258
		648.855
		443.687
		511.281
		425.325
		473.096
		616.542
		539.284
		458.369
		357.482
	2	589.448	454.869
		336.351
		470.641
		342.376
		466.928
		347.317
		449.563
		666.446
		538.516
		341.105
	3	402.726	422.769
		622.998
		388.598
		389.941
		402.028
		364.694
		377.379
		582.804
		346.221
		255.258
		404.723
		504.322
		454.305
	4	446.117	402.201
		499.245
		477.617
		361.107
		363.184
		351.461
		410.322
		269.006
		411.156
		625.501
		309.248
		302.455
	5	493.887	413.667
		307.651
		269.479
		341.997
		368.108
		331.421
		587.284
		466.33
		426.16
		315.272
		464.676
		291.138
		479.899
		339.09
		454.45
		374.567
		374.398
		391.241
		427.535
		707.133
		379.397
		509.55
	6	732.524	440.071
		621.065
		455.797
		449.79
		542.233
		534.863
		484.886
		426.248
		235.036
		283.782
		334.752
		267.626
		424.333
		354.92
		437.498
		491.179
		508.241
		290.765
		398.492
		527.394
	7	376.014	438.201
		425.62
		286.486
		414.734
		255.265
		522.315
		448.785
		361.934
		495.773
		440.559
		593.108
		625.884
		355.302
		448.122
		562.701
		364.419
		337.578
		459.556
		551.67
	8	314.398	430.244
		333.806
		423.119
		421.467
		603.57
		529.01
		496.184
		389.509
		369.274
		422.105
	9	536.973	374.014
		426.596
		295.923
		360.77
		442.569
		329.679
		348.925
		417.274
		315.873
		265.554
	Mouse	surface area	mean
PN-TH-Cre	1	283.229	420.986
		598.478
		419.541
		332.319
		426.562
		324.03
		418.698
		407.522
		415.503
		346.172
		436.769
		432.084
		451.323
		447.587
		679.99
		425.8
		406.13
		326.015
	2	388.541	422.815
		417.958
		485.092
		469.913
		556.155
		466.643
		300.779
		364.061
		322.998
		456.011
	3	389.739	510.212
		453.088
		516.592
		471.876
		507.443
		486.506
		529.173
		409.245
		354.124
		671.111
		808.727
		523.215
		598.506
		422.435
		573.028
		529.547
		498.441
		559.829
		469.98
		431.634
	4	424.602	441.536
		411.941
		493.07
		514.261
		606.498
		474.977
		499.849
		340.67
		374.139
		378.95
		442.237
		462.052
		453.253
		421.25
		508.082
		258.738
	5	428.841	410.824
		497.393
		492.068
		397.142
		323.847
		453.275
		320.53
		358.895
		425.426
	6	453.839	423.314
		423.39
		486.303
		390.589
		429.234
		356.526
	Mouse	surface area	mean
IF-DAT-Cre	1	371.974	380.128
		366.042
		635.637
		309.295
		390.93
		441.48
		280.301
		346.201
		328.289
		375.888
		390.037
		372.447
		236.848
		522.999
		333.555
	2	277.252	369.131
		381.877
		361.704
		557.773
		398.58
		397.204
		470.983
		269.853
		287.264
		329.413
		383.164
		461.08
		308.48
		283.21
	3	395.786	295.548
		333.111
		293.962
		228.44
		183.852
		246.187
		254.748
		234.175
		282.247
		353.208
		405.487
		335.373
	4	410.656	424.761
		323.85
		580.243
		417.046
		342.122
		438.686
		504.193
		381.291
	5	286.078	305.093
		267.159
		301.657
		285.118
		317.08
		350.447
		303.942
		326.194
		348.638
		265.058
		304.647
	6	404.212	327.578
		331.635
		253.02
		343.519
		280.868
		335.06
		287.179
		353.525
		359.184
	Mouse	surface area	mean
IF-TH-Cre	1	329.744	342.565
		358.083
		245.451
		282.168
		264.114
		384.376
		374.699
		390.409
		402.765
		393.846
	2	326.533	393.384
		499.203
		331.162
		257.434
		368.306
		561.811
		364.281
		431.78
		399.948
	3	343.542	347.206
		449.103
		338.352
		326.285
		369.035
		302.285
		301.841
	4	411.118	339.399
		251.648
		326.573
		275.22
		288.243
		316.24
		455.488
		407.524
		415.695
		332.701
		252.94
	Mouse	surface area	mean
Male	1	278.084	444.96
		425.903
		295.502
		395.681
		473.028
		356.624
		298.925
		214.865
		401.04
		488.701
		467.131
		426.563
		425.331
		360.577
		397.973
		408.231
		443.238
		702.866
		391.437
		409.102
		387.482
		544.139
		631.094
		441.327
		456.297
		584.959
		394.915
		524.291
		409.258
		648.855
		443.687
		511.281
		425.325
		473.096
		616.542
		539.284
		458.369
		357.482
	2	446.117	402.201
		499.245
		477.617
		361.107
		363.184
		351.461
		410.322
		269.006
		411.156
		625.501
		309.248
		302.455
	3	732.524	440.071
		621.065
		455.797
		449.79
		542.233
		534.863
		484.886
		426.248
		235.036
		283.782
		334.752
		267.626
		424.333
		354.92
		437.498
		491.179
		508.241
		290.765
		398.492
		527.394
	4	389.739	510.212
		453.088
		516.592
		471.876
		507.443
		486.506
		529.173
		409.245
		354.124
		671.111
		808.727
		523.215
		598.506
		422.435
		573.028
		529.547
		498.441
		559.829
		469.98
		431.634
	5	424.602	441.536
		411.941
		493.07
		514.261
		606.498
		474.977
		499.849
		340.67
		374.139
		378.95
		442.237
		462.052
		453.253
		421.25
		508.082
		258.738
	6	536.973	374.014
		426.596
		295.923
		360.77
		442.569
		329.679
		348.925
		417.274
		315.873
		265.554
	7	388.541	422.815
		417.958
		485.092
		469.913
		556.155
		466.643
		300.779
		364.061
		322.998
		456.011
	8	428.841	410.824
		497.393
		492.068
		397.142
		323.847
		453.275
		320.53
		358.895
		425.426
	9	453.839	423.314
		423.39
		486.303
		390.589
		429.234
		356.526
	Mouse	surface area	mean
Female	1	493.887	413.667
		307.651
		269.479
		341.997
		368.108
		331.421
		587.284
		466.33
		426.16
		315.272
		464.676
		291.138
		479.899
		339.09
		454.45
		374.567
		374.398
		391.241
		427.535
		707.133
		379.397
		509.55
	2	376.014	438.201
		425.62
		286.486
		414.734
		255.265
		522.315
		448.785
		361.934
		495.773
		440.559
		593.108
		625.884
		355.302
		448.122
		562.701
		364.419
		337.578
		459.556
		551.67
	3	283.229	420.986
		598.478
		419.541
		332.319
		426.562
		324.03
		418.698
		407.522
		415.503
		346.172
		436.769
		432.084
		451.323
		447.587
		679.99
		425.8
		406.13
		326.015
	4	402.726	422.769
		622.998
		388.598
		389.941
		402.028
		364.694
		377.379
		582.804
		346.221
		255.258
		404.723
		504.322
		454.305
	5	589.448	454.869
		336.351
		470.641
		342.376
		466.928
		347.317
		449.563
		666.446
		538.516
		341.105
	6	314.398	430.244
		333.806
		423.119
		421.467
		603.57
		529.01
		496.184
		389.509
		369.274
		422.105
NAc	Mouse	surface area	mean
Sham m. shell	1	442.549	419.494
		402.948
		348.746
		412.907
		558.466
		319.349
		424.298
		552.048
		378.28
		563.765
		568.802
		496.684
		416.966
		591.172
		466.021
		542.977
		360.459
		290.067
		251.491
		478.069
		327.787
		371.562
		384.748
		354.864
		256.819
		344.996
	2	555.247	449.158
		340.868
		373.982
		462.797
		403.042
		521.273
		331.196
		534.02
		649.079
		477.915
		291.315
	3	427.58	496.069
		581.523
		575.212
		467.414
		478.592
		438.625
		520.705
		589.754
		385.22
	4	426.036	428.668
		576.126
		369.127
		594.931
		269.127
		395.809
		434.196
		366.487
		426.17
	5	420.185	369.826
		361.889
		376.802
		403.694
		371.473
		366.235
		312.893
		368.505
		392.799
		250.312
		443.3
	6	485.341	370.78
		290.048
		324.364
		377.961
		380.43
		268.623
		304.26
		349.67
		499.866
		237.307
		487.219
		371.04
		413.533
		309.09
		574.141
		335.702
		294.663
	7	389.861	381.534
		404.625
		435.016
		347.188
		400.222
		317.409
		442.807
		315.145
	8	476.011	442.123
		443.749
		401.933
		334.983
		413.793
		462.885
		598.14
		402.974
		547.956
		338.807
NAc	Mouse	surface area	mean
Morphine m. shell	1	434.37	368.503
		459.395
		336.953
		351.362
		450.285
		307.007
		261.409
		347.241
	2	429.861	386.198
		384.386
		312.145
		438.21
		447.005
		281.047
		446.881
		428.452
		307.791
	3	337.274	355.565
		262.654
		338.716
		401.012
		311.371
		385.92
		366.301
		405.583
		391.25
	4	344.427	379.431
		423.504
		384.043
		400.749
		360.093
		367.99
		375.213
	5	286.798	352.447
		344.999
		273.859
		331.155
		528.563
		234.761
		386.844
		325.522
		491.784
		320.19
	6	384.39	368.074
		546.584
		283.495
		355.49
		401.7
		305.049
		406.031
		328.172
		301.753
	7	324.043	374.934
		288.699
		367.79
		420.117
		502.281
		316.026
		405.582
	8	387.127	379.899
		337.346
		485.218
		425.079
		304.196
		311.941
		308.247
		439.188
		387.795
		366.858
		345.439
		544.622
		295.635
NAc	Mouse	surface area	mean
Sham core	1	451.989	516.46
		336.129
		698.042
		405.458
		480.497
		720.21
		613.833
		747.598
		432.213
		390.46
		446.144
		620.599
		397.003
		386.136
		620.587
	2	472.044	454.409
		445.593
		337.706
		406.632
		511.382
		470.467
		537.039
	3	484.523	463.857
		463.713
		533.702
		455.314
		558.174
		409.254
		306.86
		499.315
	4	478.671	403.046
		383.005
		307.504
		464.231
		367.879
		285.447
		387.2
		550.432
	5	332.828	456.213
		315.865
		570.825
		559.731
		472.241
		510.774
		412.205
		464.744
		658.01
		383.29
		337.824
	6	434.473	472.013
		588.966
		430.345
		467.95
		491.82
		376.924
		503.919
		417.83
		413.819
		594.086
	7	482.513	449.147
		505.777
		463.844
		382.389
		317.061
		434.924
		508.495
		422.156
		525.169
NAc	Mouse	surface area	mean
Morphine core	1	435.957	419.971
		434.963
		402.896
		402.459
		205.009
		346.72
		664.665
		404.305
		530.696
		433.679
		333.23
		445.073
	2	457.469	476.264
		391.938
		435.071
		574.302
		479.372
		437.963
		561.606
		393.731
		554.926
	3	373.611	461.168
		574.093
		340.656
		547.709
		516.982
		540.261
		334.86
	4	401.061	465.779
		444.687
		587.459
		529.321
		394.269
		399.205
		504.448
	5	399.983	466.535
		396.06
		430.33
		285.184
		467.787
		531.933
		764.211
		496.99
		426.34
	6	376.524	458.31
		447.685
		467.399
		405.582
		323.592
		679.407
		507.979
	Mouse	surface area	mean
PFC sham	1	561.423	512.909
		449.669
		414.971
		523.556
		614.928
	2	512.468	542.982
		719.007
		535.918
		588.831
		540.004
		684.889
		380.947
		581.443
		532.829
		353.48
	3	527.957	591.749
		530.777
		914.495
		577.571
		372.698
		799.738
		570.826
		439.928
	4	473.636	618.098
		520.635
		838.155
		639.966
	5	440.345	429.305
		529.203
		507.503
		421.453
		290.54
		386.782
	6	480.353	516.485
		517.47
		553.805
		826.827
		512.409
		533.927
		381.39
		553.261
		477.789
		327.618
	7	951.582	540.702
		452.898
		485.15
		438.746
		375.132
	8	525.806	603.712
		493.738
		595.325
		886.757
		404.755
		665.436
		743.228
		514.654
	Mouse	surface area	mean
PFC morphine	1	666.179	623.277
		665.898
		716.595
		568.901
		583.846
		660.309
		501.207
	2	739.109	617.824
		497.025
		599.981
		622.1
		517.988
		730.743
	3	805.959	665.437
		542.385
		600.298
		705.248
		615.02
		723.715
	4	817.412	635.143
		580.528
		616.36
		625.177
		617.482
		864.088
		387.854
		421.239
		507.952
		737.455
		693.822
		752.344
	5	589.175	599.5
		538.05
		689.02
		581.754
	6	339.999	598.017
		604.056
		844.157
		469.525
		601.995
		570.36
		596.322
		674.034
		515.326
		509.45
		670.028
		780.956
